# Supplementary material
Source: PubMed Central journal article supplement (PMC3645519)
Supplement: 1219748110_pnas.201219748SI.pdf [file 1219748110_pnas.201219748SI.pdf]

# Supporting Information

Yang et al. 10.1073/pnas.1219748110

## SI Materials and Methods

**Three-Point Bending Test.** Femurs from five wild-type and four *Esl-1*<sup>-/-</sup> 4-wk-old mice were collected, stripped of soft tissues and frozen for mechanical testing to assess the material properties. The femurs were tested in three-point bending using a span of 6 mm on a computer-controlled testing apparatus (model 5848; Instron). All of the femurs were tested wet at room temperature. Following the preloading to 1 N for 5 s, the femurs were compressed to failure at a rate of 0.1 mm/s. Load and displacement data were captured at rate of 40 Hz by using BLUEHILL software (Instron). Extrinsic material properties were assessed from the load-displacement curve including maximum load, stiffness, and energy. Geometric data obtained from the micro-computed tomography analysis of the femoral midshaft were used to calculate the intrinsic material properties: ultimate strength, elastic modulus, and fracture toughness.

**RNA Isolation and Quantitative RT-PCR.** Flash-frozen mouse calvaria are collected from P1 *Esl-1*<sup>-/-</sup> or WT mice ( $n = 5$ ) for total RNA extraction and first-strand cDNA synthesis. Quantitative RT-PCR is performed on a LightCycler.5 (Roche) using SYBR

Green I reagent (Roche).  $\beta_2$ -Microglobulin is used as a reference gene for cDNA concentration normalization.

**Primary OB Culture.** BMSCs and BMMCs are cultured from total bone marrow isolated from the femurs and tibias of 2-mo-old mice. The  $7.5 \times 10^4$  per well BMSCs are reseeded to 24-well plates and cultured in osteogenic medium ( $\alpha$ -MEM supplied with 10% (vol/vol) FBS, 500  $\mu$ M ascorbic acid, and 10 mM  $\beta$ -glycerophosphate). ALP staining or Alizarin Red S staining was performed on the cultures. The Alizarin Red S stains are dissolved by 10% (g/ml) cetylpyridinium chloride and quantified on a plate reader.

**Primary OC Cultures.** BMMCs are seeded in 96-well plates at a density of  $1.4 \times 10^4$  per well and treated with M-CSF (15  $\mu$ g/mL) and RANKL (30 ng/mL) for 6 d, and visualized and quantified by TRAP staining.

**OB-OC Coculture.** The  $7.5 \times 10^4$  BMSCs and  $7.5 \times 10^5$  splenocytes were cocultured in each well of 24-well plates with  $\alpha$ -MEM supplied with 10% (vol/vol) FBS, 100 nM dexamethasone, 100  $\mu$ M ascorbic acid phosphate, and 10 nM 1 $\alpha$ 25-dihydroxyvitamin D3. The formation of OCs was detected at day 5 using TRAP staining.

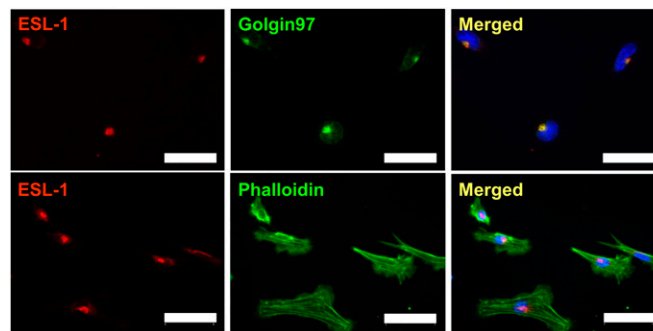

Fig. S1. ESL-1 is expressed in primary mouse osteoblasts and localized in the Golgi apparatus. Golgin 97 antibody or phalloidin indicates Golgi apparatus or actin cytoskeleton for contrast. (Scale bars: 50  $\mu$ m.)

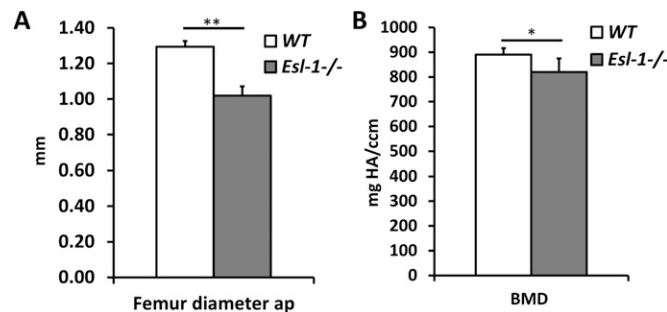

Fig. S2. Midfemurs of 1-mo-old male *Esl-1*<sup>-/-</sup> mice show significantly decreased anterior-posterior diameter (A) and cortical bone mineral density (B), compared with WT.  $n = 4$ ; \* $P < 0.05$ ; \*\* $P < 0.01$ .

**Table S1. Bone material properties obtained from three-point bending at the femoral midshaft**

| Property                  | Wild-type mice | <i>Esl-1<sup>-/-</sup></i> mice | <i>P</i> value |
|---------------------------|----------------|---------------------------------|----------------|
| Maximum load, N           | 11.83 ± 3.22   | 5.78 ± 2.29                     | 0.013          |
| Stiffness, N/mm           | 78.21 ± 24.92  | 48.74 ± 20.59                   | 0.093          |
| Energy to failure, N*mm   | 8.94 ± 2.24    | 3.75 ± 1.33                     | 0.004          |
| Ultimate strength, MPa    | 54.78 ± 13.78  | 57.66 ± 10.46                   | 0.732          |
| Elastic modulus, GPa      | 1.70 ± 0.41    | 2.92 ± 0.59                     | 0.016          |
| Toughness to failure, MPa | 8.60 ± 0.77    | 6.42 ± 1.91                     | 0.103          |

Results are given as mean ± SDs.
